# Supplementary material for: Differential Progression of Regional Hippocampal Atrophy in Aging and Parkinson’s Disease
Source: Front Aging Neurosci. 2018 Oct 11;10:325. doi: 10.3389/fnagi.2018.00325 (PMC6193198; doi:10.3389/fnagi.2018.00325)
Supplement: Supplementary file 1 [file Table_1.docx]

Supplementary Material

Differential progression of regional hippocampal atrophy in aging and Parkinson’s disease

Carme Uribe, MSc1; Barbara Segura, PhD1; Hugo Cesar Baggio, MD, PhD1; Anna Campabadal, MSc1; Anna Isabel Garcia-Diaz, PhD1; Alexandra Abos, MSc1; Yaroslau Compta, MD, PhD2,3,4; Maria Jose Marti, MD, PhD2,3,4; Francesc Valldeoriola, MD, PhD2,3,4; Nuria Bargallo, MD, PhD5; Carme Junque, PhD1,2,3*.

1Medical Psychology Unit, Department of Medicine. Institute of Neuroscience, University of Barcelona. Barcelona, Catalonia, Spain.

2Institute of Biomedical Research August Pi i Sunyer (IDIBAPS). Barcelona, Catalonia, Spain.

3Centro de Investigación Biomédica en Red sobre Enfermedades Neurodegenerativas (CIBERNED), Hospital Clínic de Barcelona. Barcelona, Spain.

4Parkinson’s Disease and Movement Disorders Unit, Neurology Service, Hospital Clínic de Barcelona. Institute of Neuroscience, University of Barcelona, Barcelona, Catalonia, Spain.

5Centre de Diagnòstic per la Imatge, Hospital Clínic, Barcelona, Catalonia, Spain.

*** Correspondence:**Prof. Carme Junque

Medical Psychology Unit, Department of Medicine. University of Barcelona

Casanova 143 (08036) Barcelona, Spain

Phone: (+34) 93 402 45 70 // Fax: (+34) 93 403 52 94 // E-mail: [cjunque@ub.edu](mailto:cjunque@ub.edu)

# Supplementary Methods 1

Libraries and functions used for the statistical analysis using R:

| *Demographic and clinical variables.*  *Descriptives* | **psych** library: describe.by() function for means, medians and SD.  **stats** library: IQR() function for interquartile range. |
| --- | --- |
| *Demographical and clinical variables.*  *Test stats* | **stats** library:  chisq.test() function for chi-squared test;  kruskal.test() function  pairwise.wilcox.test() for multiple comparisons with Bonferroni P-adjusted. |
| *Multiple linear regression model* | **stats** library: lm() function and anova() to test for differences between segments and total volumes models.  **MASS** library: stepAIC() function to fit the best model. |

# Supplementary Methods 2

Multiple linear regression models resulting from stepwise Akaike information criteria:

|  | **time 1 hippocampal volumes ratios** | **time 2 minus time 1 hippocampal volumes ratios** |
| --- | --- | --- |
| *Model 1 hippocampal segments* | | |
| **RAVLT total learning** | lh CA3 + rh CA4 + bl CA1 + rh subiculum + rh presubiculum + bl HATA + rh hippocampal tail | education + bl CA1 + bl CA3 + rh CA4 + bl subiculum + bl presubiculum + bl parasubiculum + bl HATA + bl fimbria + bl hippocampal tail + bl fissure + bl molecular layer + bl GC-ML-DG |
| **RAVLT recall** | age + education + lh CA3 + rh CA1 + rh CA4 + bl parasubiculum + rh subiculum + rh fimbria + rh hippocampal tail + rh fissure + lh molecular layer | education + lh CA1 + lh CA3 + bl CA4 + lh subiculum + bl presubiculum + lh parasubiculum + lh HATA + bl fimbria + bl hippocampal tail + lh fissure + lh molecular layer + lh GC-ML-DG |
| **RAVLT recognition** | bl CA1 + rh CA4 + bl subiculum + rh HATA + bl hippocampal tail + bl molecular layer | age + education + bl CA1 + bl CA3 + bl CA4 + bl subiculum + bl presubiculum + bl parasubiculum + bl HATA + bl fimbria + bl hippocampal tail + bl fissure + bl molecular layer |
| *Model 2 whole hippocampi* | | |
| **RAVLT total learning** | rh whole hippocampus | age + lh whole hippocampus |
| **RAVLT recall** | bl whole hippocampus | age + bl whole hippocampus |
| **RAVLT recognition** | No prediction model | lh whole hippocampus |

# Supplementary Table 1 Means and SD of hippocampal segments

|  | | **PD-NC**  **n = 28**  **mean (SD)** | **PD-MCI**  **n = 16**  **mean (SD)** | **PD all sample**  **n = 44**  **mean (SD)** | **Controls**  **n = 21**  **mean (SD)** |
| --- | --- | --- | --- | --- | --- |
| *Left hippocampal tail* | **time 1** | 15.0 (1.5) | 13.8 (1.4) | 14.6 (1.6) | 14.6 (1.6) |
| **time 2** | 14.8 (1.6) | 13.9 (1.5) | 14.5 (1.6) | 14.6 (1.9) |
| *Right hippocampal tail* | **time 1** | 15.3 (1.3) | 15.0 (1.6) | 15.2 (1.4) | 15.5 (1.7) |
| **time 2** | 15.1 (1.1) | 15.0 (1.7) | 15.1 (1.3) | 15.3 (1.8) |
| *Left CA1* | **time 1** | 17.9 (0.9) | 18.7 (0.9) | 18.2 (1.0) | 18.3 (1.0) |
| **time 2** | 18.3 (1.0) | 18.8 (0.9) | 18.5 (1.0) | 18.3 (1.0) |
| *Right CA1* | **time 1** | 18.2 (1.1) | 18.6 (0.7) | 18.4 (1.0) | 18.1 (0.9) |
| **time 2** | 18.5 (1.0) | 18.7 (1.0) | 18.6 (0.9) | 18.2 (1.1) |
| *Left CA3* | **time 1** | 6.3 (0.6) | 6.4 (0.6) | 6.3 (0.6) | 6.7 (0.7) |
| **time 2** | 6.4 (0.6) | 6.4 (0.7) | 6.4 (0.6) | 6.7 (0.7) |
| *Right CA3* | **time 1** | 6.7 (0.7) | 6.8 (0.5) | 6.7 (0.6) | 6.8 (0.7) |
| **time 2** | 6.8 (0.6) | 6.7 (0.5) | 6.8 (0.6) | 6.9 (0.8) |
| *Left CA4* | **time 1** | 8.4 (0.5) | 8.1 (0.5) | 8.3 (0.5) | 8.4 (0.5) |
| **time 2** | 8.4 (0.5) | 8.2 (0.6) | 8.3 (0.6) | 8.4 (0.5) |
| *Right CA4* | **time 1** | 8.6 (0.5) | 8.3 (0.5) | 8.5 (0.5) | 8.6 (0.5) |
| **time 2** | 8.7 (0.5) | 8.4 (0.4) | 8.6 (0.5) | 8.6 (0.5) |
| *Left subiculum* | **time 1** | 11.9 (0.9) | 11.9 (0.7) | 11.9 (0.8) | 11.6 (0.7) |
| **time 2** | 11.8 (0.9) | 12.0 (0.8) | 11.9 (0.9) | 11.6 (0.8) |
| *Right subiculum* | **time 1** | 11.7 (0.8) | 11.7 (0.7) | 11.7 (0.8) | 11.5 (0.7) |
| **time 2** | 11.7 (0.9) | 11.8 (0.8) | 11.7 (0.8) | 11.5 (0.7) |
| *Left presubiculum* | **time 1** | 8.5 (1.1) | 8.9 (0.9) | 8.6 (1.0) | 8.4 (0.9) |
| **time 2** | 8.4 (1.1) | 8.8 (0.8) | 8.5 (1.1) | 8.4 (0.8) |
| *Right presubiculum* | **time 1** | 7.8 (1.0) | 7.9 (0.7) | 7.8 (0.9) | 7.8 (0.7) |
| **time 2** | 7.7 (0.9) | 7.8 (0.8) | 7.7 (0.9) | 7.7 (0.8) |
| *Left parasubiculum* | **time 1** | 1.7 (0.4) | 2.0 (0.5) | 1.8 (0.4) | 1.7 (0.5) |
| **time 2** | 1.7 (0.4) | 2.1 (0.6) | 1.9 (0.5) | 1.7 (0.5) |
| *Right parasubiculum* | **time 1** | 1.6 (0.3) | 1.6 (0.4) | 1.6 (0.3) | 1.6 (0.5) |
| **time 2** | 1.6 (0.3) | 1.7 (0.4) | 1.6 (0.4) | 1.6 (0.5) |
| *Left fimbria* | **time 1** | 2.3 (0.6) | 2.3 (0.5) | 2.3 (0.6) | 2.1 (0.4) |
| **time 2** | 2.1 (0.6) | 2.2 (0.6) | 2.2 (0.6) | 2.1 (0.3) |
| *Right fimbria* | **time 1** | 1.8 (0.5) | 2.0 (0.5) | 1.8 (0.5) | 1.8 (0.5) |
| **time 2** | 1.7 (0.5) | 1.8 (0.6) | 1.7 (0.5) | 1.8 (0.5) |
| *Left fissure* | **time 1** | 4.5 (0.9) | 4.9 (1.0) | 4.6 (0.9) | 4.8 (0.9) |
| **time 2** | 4.7 (1.0) | 5.3 (1.2) | 4.9 (1.1) | 5.1 (0.8) |
| *Right fissure* | **time 1** | 4.3 (0.9) | 5.1 (1.2) | 4.6 (1.1) | 4.8 (0.9) |
| **time 2** | 4.9 (1.0) | 5.5 (1.1) | 5.1 (1.1) | 5.1 (0.9) |
| *Left HATA* | **time 1** | 1.6 (0.2) | 1.6 (0.2) | 1.6 (0.2) | 1.7 (0.2) |
| **time 2** | 1.6 (0.2) | 1.6 (0.3) | 1.6 (0.3) | 1.7 (0.2) |
| *Right HATA* | **time 1** | 1.6 (0.2) | 1.6 (0.2) | 1.6 (1.2) | 1.6 (0.2) |
| **time 2** | 1.6 (0.2) | 1.6 (0.3) | 1.6 (0.2) | 1.6 (0.3) |
| *Left molecular layer* | **time 1** | 17.2 (0.4) | 17.3 (0.5) | 17.2 (0.5) | 17.3 (0.4) |
| **time 2** | 17.2 (0.4) | 17.1 (0.5) | 17.2 (0.5) | 17.2 (0.4) |
| *Right molecular layer* | **time 1** | 17.3 (0.5) | 17.4 (0.6) | 17.3 (0.6) | 17.3 (0.5) |
| **time 2** | 17.3 (0.5) | 17.3 (0.5) | 17.3 (0.5) | 17.2 (0.5) |
| *Left GC-ML-DG* | **time 1** | 9.2 (0.5) | 9.0 (0.4) | 9.1 (0.5) | 9.3 (0.5) |
| **time 2** | 9.2 (0.5) | 9.0 (0.5) | 9.1 (0.5) | 9.3 (0.5) |
| *Right GC-ML-DG* | **time 1** | 9.5 (0.5) | 9.2 (0.5) | 9.3 (0.5) | 9.4 (0.5) |
| **time 2** | 9.5 (0.5) | 9.2 (0.5) | 9.4 (0.5) | 9.4 (0.6) |
| *Left whole hippocampus* | **time 1** | 0.3 (0.0) | 0.2 (0.0) | 0.2 (0.0) | 0.2 (0.0) |
| **time 2** | 0.2 (0.0) | 0.2 (0.0) | 0.2 (0.0) | 0.2 (0.0) |
| *Right whole hippocampus* | **time 1** | 0.3 (0.0) | 0.2 (0.0) | 0.3 (0.0) | 0.3 (0.0) |
| **time 2** | 0.3 (0.0) | 0.2 (0.0) | 0.2 (0.0) | 0.2 (0.0) |

CA, Cornu Ammonis; GC-ML-DG, Granule cells in the molecular layer of the dentate gyrus; HATA, Hippocampal Amygdala Transition Area; PD-MCI, Parkinson’s disease mild cognitive impairment; PD-NC, Parkinson’s disease normal cognition; SD, standard deviation.

Values are volumes in mm3. Hippocampal segments are ratios to whole hippocampal volumes ((lh or rh segment / lh or rh whole hippocampus) * 100). Whole hippocampus volumes are ratios to estimated total intracranial volume ((lh or rh whole hippocampus / eTIV) * 100).

# Supplementary Table 2 Multiple regression results of time 1 hippocampal volumes ratios as predictors of memory performance change over time

| *Model 1 hippocampal segments* | | | | *Model 2 whole hippocampi* | | |
| --- | --- | --- | --- | --- | --- | --- |
|  | **variables** | | **t-stat (P-value)** | **variables** | | **t-stat (P-value)** |
| RAVLT total learning | Non-significant model | | | right hippocampus | **2.841 (0.007)** | |
| RAVLT recall | age | **-2.310 (0.028)** | | left hippocampus | **-2.610 (0.013)** | |
| education | -1.707 (0.098) | | right hippocampus | **3.346 (0.002)** | |
| left CA3 | **-3.040 (0.005)** | |  | | |
| right CA1 | -1.428 (0.163) | |
| right CA4 | **-3.561 (0.001)** | |
| left parasubiculum | **-5.825 (<0.001)** | |
| right subiculum | **-3.147 (0.004)** | |
| right parasubiculum | -0.640 (0.527) | |
| right fimbria | **-4.831 (<0.001)** | |
| right hippocampal tail | **-5.798 (0.001)** | |
| right fissure | **3.195 (0.003)** | |
| left molecular layer | **-3.491 (0.001)** | |
| RAVLT recognition | Non-significant model | | | No prediction model | | |

CA, Cornu Ammonis; RAVLT, Rey’s Auditory Verbal Learning test.

Regions that reached significance P<0.05 are marked in bold.

# Supplementary Table 3 Multiple regression results of time 2 minus time 1 hippocampal volumes ratios as explanatory variables of memory changes

| *Model 1 hippocampal segments* | | | | *Model 2 whole hippocampi* | | |
| --- | --- | --- | --- | --- | --- | --- |
|  | **variables** | | **t-stat (P-value)** | **variables** | **t-stat (P-value)** | |
| **RAVLT total learning** | | Non-significant model |  | age | | -1.600 (0.117) |
| left hippocampus | | 1.688 (0.099) |
| **RAVLT recall** | | education | 1.299 (0.205) | age | | -1.376 (0.176) |
| left CA1 | 1.211 (0.237) | left hippocampus | | **2.151 (0.038)** |
| left CA3 | 1.211 (0.237) | right hippocampus | | -1.556 (0.128) |
| left CA4 | 1.211 (0.237) |  | | |
| right CA4 | 1.696 (0.102) |
| left subiculum | 1.211 (0.237) |
| left presubiculum | 1.211 (0.237) |
| left parasubiculum | 1.211 (0.237) |
| right presubiculum | 1.123 (0.272) |
| left HATA | 1.211 (0.237) |
| left fimbria | 1.211 (0.237) |
| right fimbria | **2.650 (0.014)** |
| left hippocampal tail | 1.211 (0.237) |
| right hippocampal tail | **2.986 (0.006)** |
| left fissure | **-2.888 (0.008)** |
| left molecular layer | 1.211 (0.237) |
| left GC-ML-DG | 1.211 (0.237) |
| **RAVLT recognition** | | Non-significant model | | left hippocampus | | **2.567 (0.014)** |

CA, Cornu Ammonis; GC-ML-DG, Granule cells in the molecular layer of the dentate gyrus; HATA, Hippocampal Amygdala Transition Area; RAVLT, Rey’s Auditory Verbal Learning test.

Regions that reached significance P<0.05 are marked in bold.
